# Supplementary material for: Increasing objectively measured sedentary time increases clustered cardiometabolic risk: a 6 year analysis of the ProActive study
Source: Springer Nature journal article supplement (doi:10.1007/s00125-013-3102-y), 2013-11-05
Supplement: MOESM1 [file 8091972]

## Supplementary Table S1

Table S1. Descriptive characteristics of men and women at baseline and 6-year follow-up, *ProActive*

| Characteristic                               | Men<br>(n=78) |                         | Women<br>(n=93)           |                            |
|----------------------------------------------|---------------|-------------------------|---------------------------|----------------------------|
|                                              | Baseline      | 6-year<br>follow-up     | Baseline                  | 6-year<br>follow-up        |
| Age, years                                   | 42.0 (6.2)    | 48.3 (6.2) <sup>d</sup> | 43.0 (6.3)                | 49.2 (6.3) <sup>d</sup>    |
| Body mass index, kg/m <sup>2</sup>           | 27.9 (4.0)    | 27.9 (4.0)              | 28.1 (5.4)                | 28.1 (5.4) <sup>b</sup>    |
| CCMR                                         | 0.0 (0.7)     | 0.0 (0.7)               | 0.0 (0.7)                 | 0.1 (0.9)                  |
| CCMR <sub>no adip</sub>                      | 0.0 (0.7)     | 0.1 (0.7)               | 0.0 (0.7)                 | 0.1 (0.9)                  |
| Waist circumference, cm                      | 99.8 (10.1)   | 99.1 (11.2)             | 89.5 (12.5) <sup>g</sup>  | 91.3 (14.3) <sup>b g</sup> |
| Triacylglycerol <sup>a</sup> , mmol/l        | 1.5 (0.5)     | 1.5 (0.4)               | 1.1 (0.3) <sup>g</sup>    | 1.0 (0.4) <sup>g</sup>     |
| HDL-cholesterol, mmol/l                      | 1.2 (0.3)     | 1.2 (0.2)               | 1.6 (0.4) <sup>g</sup>    | 1.6 (0.4) <sup>g</sup>     |
| Systolic blood pressure, mmHg                | 123.4 (10.7)  | 124.8 (11.2)            | 116.0 (13.2) <sup>g</sup> | 120.9 (14.6) <sup>c</sup>  |
| Diastolic blood pressure, mmHg               | 78.3 (8.7)    | 76.9 (9.4)              | 73.7 (10.1) <sup>f</sup>  | 75.9 (9.3) <sup>b</sup>    |
| Fasting plasma glucose <sup>a</sup> , mmol/l | 5.2 (0.2)     | 5.6 (0.3) <sup>c</sup>  | 4.8 (0.1) <sup>g</sup>    | 5.0 (0.1) <sup>d f</sup>   |
| Fasting serum insulin <sup>a</sup> , pmol/l  | 60.2 (0.7)    | 57.3 (0.9)              | 49.9 (0.8) <sup>e</sup>   | 43.7 (1.1) <sup>b e</sup>  |
| Sedentary time, hours/day                    | 8.0 (1.6)     | 9.6 (1.8) <sup>d</sup>  | 7.8 (1.4)                 | 8.8 (1.6) <sup>d f</sup>   |
| MVPA, hours/day                              | 0.5 (0.3)     | 0.6 (0.4)               | 0.5 (0.3)                 | 0.4 (0.3) <sup>f</sup>     |
| TV viewing time, hours/day                   | 2.3 (1.0)     | 2.5 (1.0) <sup>b</sup>  | 2.5 (1.2)                 | 2.8 (1.3) <sup>c</sup>     |
| Monitor wear time, hours/day                 | 13.8 (1.3)    | 14.9 (1.4) <sup>d</sup> | 13.5 (1.3)                | 14.1 (1.3) <sup>d g</sup>  |

Data are means (SD). <sup>a</sup> Geometric mean (SD).

Abbreviations: CCMR: clustered cardio-metabolic risk score including waist circumference; CCMR<sub>no adip</sub>: clustered cardio-metabolic risk score excluding waist circumference; MVPA: moderate-to-vigorous physical activity.

<sup>b</sup> p<0.05; <sup>c</sup> p<0.01; <sup>d</sup> p<0.001 between baseline and follow-up; <sup>e</sup> p<0.05; <sup>f</sup> p<0.01; <sup>g</sup> p<0.001 between men and women.
