# Supplementary material for: Increasing objectively measured sedentary time increases clustered cardiometabolic risk: a 6 year analysis of the ProActive study
Source: Springer Nature journal article supplement (doi:10.1007/s00125-013-3102-y), 2013-11-05
Supplement: MOESM2 [file 8091972]

## Supplementary Table S2

Table S2. Associations between change in sedentary time (hours/day), moderate-to-vigorous physical activity (MVPA; hours/day) and TV viewing time (hours/day) over 6 years with changes in cardio-metabolic risk from baseline to six year follow-up, standardised regression coefficients

| Cardio-metabolic outcome                 | Model | Sedentary time                 | MVPA time                         | TV viewing time                |
|------------------------------------------|-------|--------------------------------|-----------------------------------|--------------------------------|
| CCMR <sup>a b c</sup>                    | A     | 0.37 (0.15, 0.59) <sup>e</sup> | -0.24 (-0.42, -0.07) <sup>e</sup> | 0.17 (0.01, 0.34) <sup>d</sup> |
|                                          | B     | 0.29 (0.05, 0.53) <sup>d</sup> | -0.15 (-0.34, 0.04)               | 0.15 (-0.03, 0.32)             |
| CCMR <sub>no adip</sub> <sup>a b c</sup> | A     | 0.33 (0.11, 0.55) <sup>e</sup> | -0.21 (-0.39, -0.04)              | 0.15 (-0.02, 0.32)             |
|                                          | B     | 0.26 (0.02, 0.50) <sup>d</sup> | -0.13 (-0.32, 0.06)               | 0.13 (-0.04, 0.30)             |
| Waist circumference                      | A     | 0.33 (0.10, 0.55) <sup>e</sup> | -0.26 (-0.43, -0.09) <sup>e</sup> | 0.18 (0.02, 0.35) <sup>d</sup> |
|                                          | B     | 0.22 (-0.02, 0.46)             | -0.19 (-0.38, -0.01) <sup>d</sup> | 0.15 (-0.02, 0.32)             |
| Triacylglycerol <sup>a</sup>             | A     | 0.20 (-0.01, 0.41)             | -0.01 (-0.16, 0.16)               | 0.09 (-0.07, 0.24)             |
|                                          | B     | 0.23 (0.01, 0.45) <sup>d</sup> | 0.07 (-0.11, 0.25)                | 0.09 (-0.08, 0.25)             |
| HDL-cholesterol <sup>a</sup>             | A     | -0.07 (-0.28, 0.13)            | 0.13 (-0.03, 0.28)                | -0.05 (-0.20, 0.11)            |
|                                          | B     | -0.01 (-0.23, 0.21)            | 0.12 (-0.05, 0.30)                | -0.03 (-0.19, 0.13)            |
| Systolic blood pressure <sup>b</sup>     | A     | 0.07 (-0.14, 0.27)             | 0.02 (-0.14, 0.18)                | -0.01 (-0.16, 0.15)            |
|                                          | B     | 0.10 (-0.13, 0.32)             | 0.06 (-0.12, 0.24)                | -0.01 (-0.17, 0.15)            |
| Diastolic blood pressure <sup>b</sup>    | A     | 0.13 (-0.07, 0.33)             | -0.06 (-0.22, 0.09)               | -0.01 (-0.16, 0.14)            |
|                                          | B     | 0.11 (-0.10, 0.33)             | -0.03 (-0.20, 0.14)               | -0.02 (-0.18, 0.14)            |
| Fasting plasma glucose <sup>c</sup>      | A     | 0.05 (-0.16, 0.26)             | -0.09 (-0.25, 0.07)               | 0.16 (0.01, 0.31) <sup>d</sup> |
|                                          | B     | 0.01 (-0.22, 0.23)             | -0.08 (-0.26, 0.09)               | 0.14 (-0.02, 0.30)             |
| Fasting serum insulin <sup>c</sup>       | A     | 0.20 (-0.02, 0.41)             | -0.19 (-0.36, -0.02) <sup>d</sup> | 0.16 (0.01, 0.33) <sup>d</sup> |
|                                          | B     | 0.12 (-0.12, 0.35)             | -0.15 (-0.33, 0.03)               | 0.15 (-0.01, 0.32)             |

Data are standardised regression coefficients (95% CI) following standardisation of exposure and outcome variables. Statistically significant ( $P < 0.05$ ) estimates are indicated in bold.

**Model A:** adjusted for baseline age, gender, socio-economic status, exposure under study and cardio-metabolic risk variable under study; baseline and change in smoking status; change in monitor wear time and in medication for dyslipidaemia<sup>a</sup>/hypertension<sup>b</sup>/dysglycaemia<sup>c</sup>; and follow-up time; **Model B:** adjusted for all covariates in Model A plus baseline and change in MVPA/sedentary time.

Abbreviations: CCMR: clustered cardio-metabolic risk score including waist circumference; CCMR<sub>no adip</sub>: clustered cardio-metabolic risk score excluding waist circumference.

<sup>d</sup>  $p < 0.05$ ; <sup>e</sup>  $p < 0.01$
